# Supplementary material for: Quality standards for safe medication in nursing homes: development through a multistep approach including a Delphi consensus study
Source: HighWire-hosted journal article supplement (doi:10.1136/bmjopen-2021-054364), 2021-10-01
Supplement: bmjopen-2021-054364supp001_data_supplement.pdf [file bmjopen-2021-054364supp001_data_supplement.pdf]

## Additional file 1: Literature search terms

**Table: Literature search terms used for the two searches in scientific databases.**

|               | <b>Nursing home residents</b>                                                                                                                                 | <b>Elderly patients</b>                                                                                                                                                                                |
|---------------|---------------------------------------------------------------------------------------------------------------------------------------------------------------|--------------------------------------------------------------------------------------------------------------------------------------------------------------------------------------------------------|
| <b>CINAHL</b> | Exact Major Subject Headings: prescribing AND guidelines AND nursing homes or care homes or long term care or residential care AND publication date 2008-2018 | Exact Major Subject Headings: prescribing AND guidelines AND geriatrics or older adults or elderly AND publication date 2008-2018                                                                      |
| <b>EMBASE</b> | (Emtree major focus-unexp.): 'nursing home'/mj AND 'prescription'/mj AND 'practice guideline'/mj AND [2008-2018]/py                                           | ('frail elderly'/mj OR 'aged'/mj) AND 'prescription'/mj AND 'practice guideline'/mj AND [2008-2018]/py                                                                                                 |
| <b>PUBMED</b> | ((((nursing home[MeSH Terms]) AND guideline[MeSH Terms]) AND drug prescription[MeSH Terms])) AND ("2008"[Date - Publication] : "2018"[Date - Publication])    | ((((aged OR frail elderly OR Aged, 80 and over OR geriatrics[MeSH Terms])) AND guideline[MeSH Terms]) AND drug prescription[MeSH Terms]) AND ("2008"[Date - Publication] : "2018"[Date - Publication]) |
